# Supplementary material for: The influence of surface ligand chemistry for the synthesis of blue fluorescent gold nanoclusters for the detection of serotonin in biofluids
Source: Royal Society of Chemistry journal article supplement (doi:10.1039/d2nj04797g), 2023-01-01
Supplement: d2nj04797g1.pdf [file d2nj04797g1.pdf]

**Supporting Information of**

**Influence of surface ligand chemistry for synthesis of blue fluorescent gold nanoclusters for detection of serotonin in biofluids**

**Shraddha Borse<sup>a</sup>, Z. V. P. Murthy<sup>b</sup>, Tae Jung Park<sup>c</sup> and Suresh Kumar Kailasa<sup>a\*</sup>**

*<sup>a</sup>Department of Chemistry, Sardar Vallabhbhai National Institute of Technology, Surat-395 007, India*

*<sup>b</sup>Department of Chemical Engineering, Sardar Vallabhbhai National Institute of Technology, Surat – 395007, India*

*<sup>c</sup>Research Institute of Chem-Bio Diagnostic Technology, Chung-Ang University, 84 Heukseok-ro, Dongjak-gu, Seoul 06974, Republic of Korea*

*\*Corresponding author, Phone: +91-261-2201730; Fax: +91-261-2227334*

*E-mail: sureshkumarchem@gmail.com; skk@chem.svnit.ac.in*

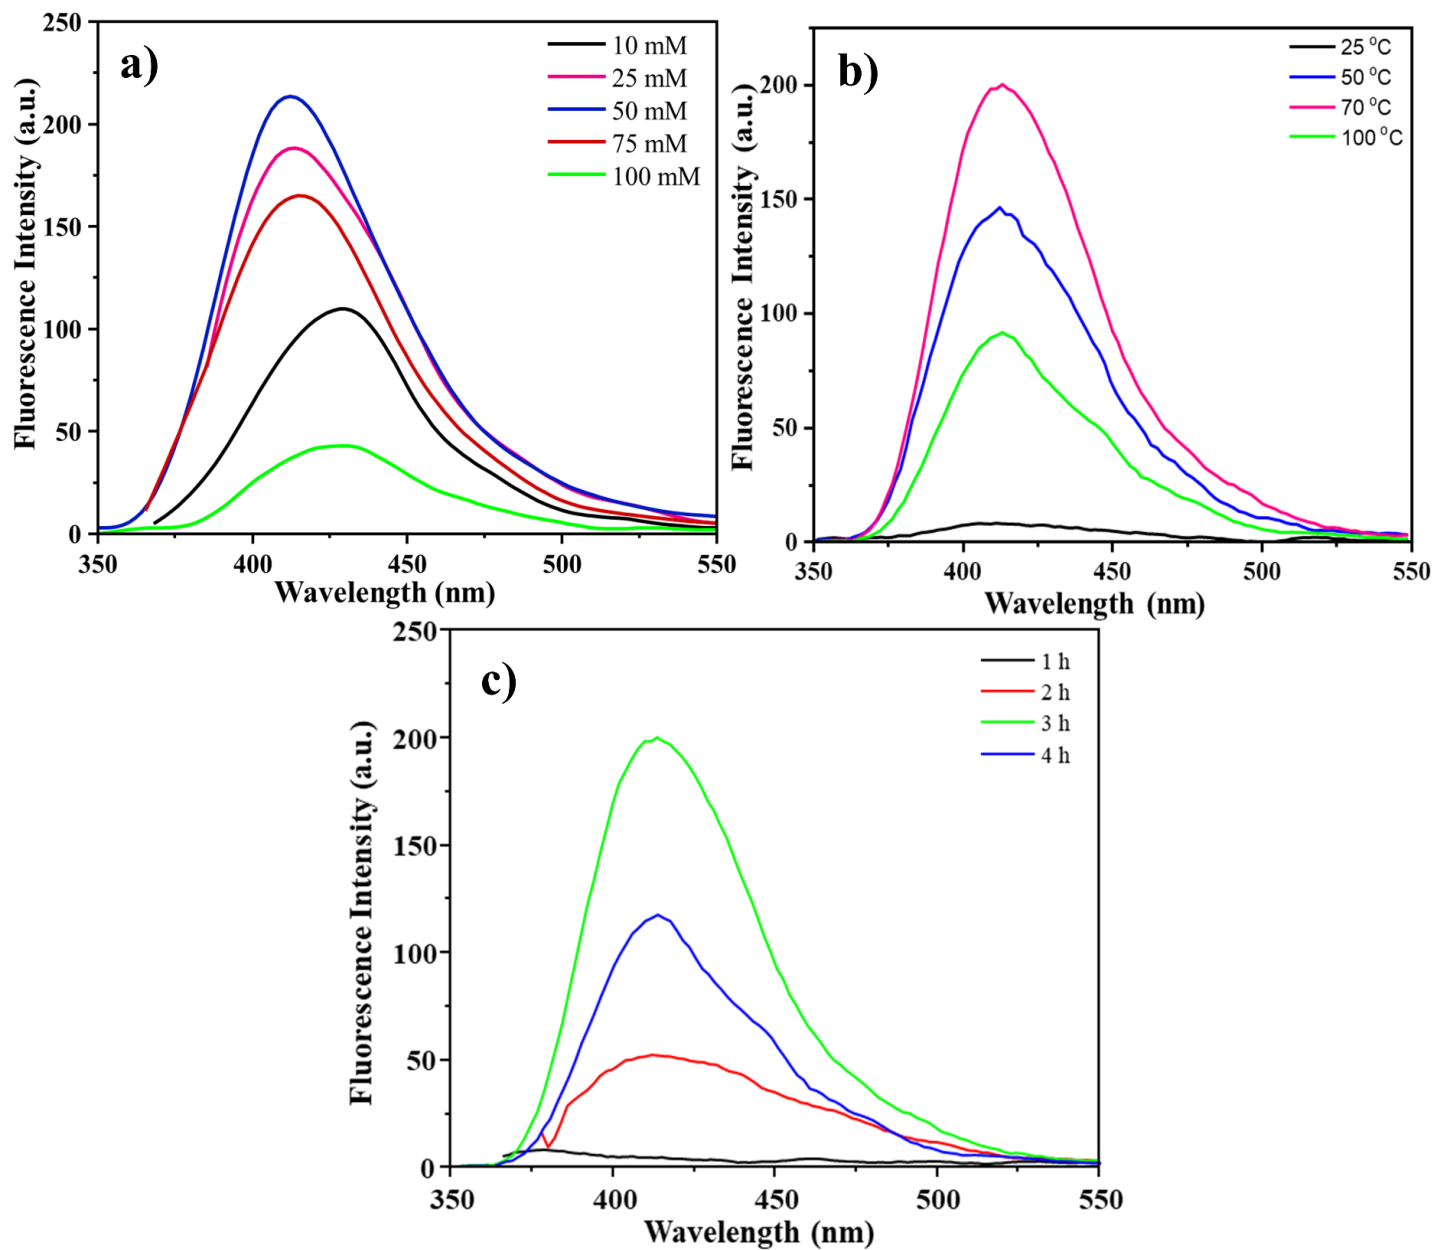

**Figure S1.** Investigation of optimum parameters a) concentration of 6-TG, b) temperature and c) reaction time for the synthesis of 6-TG-Au NCs.

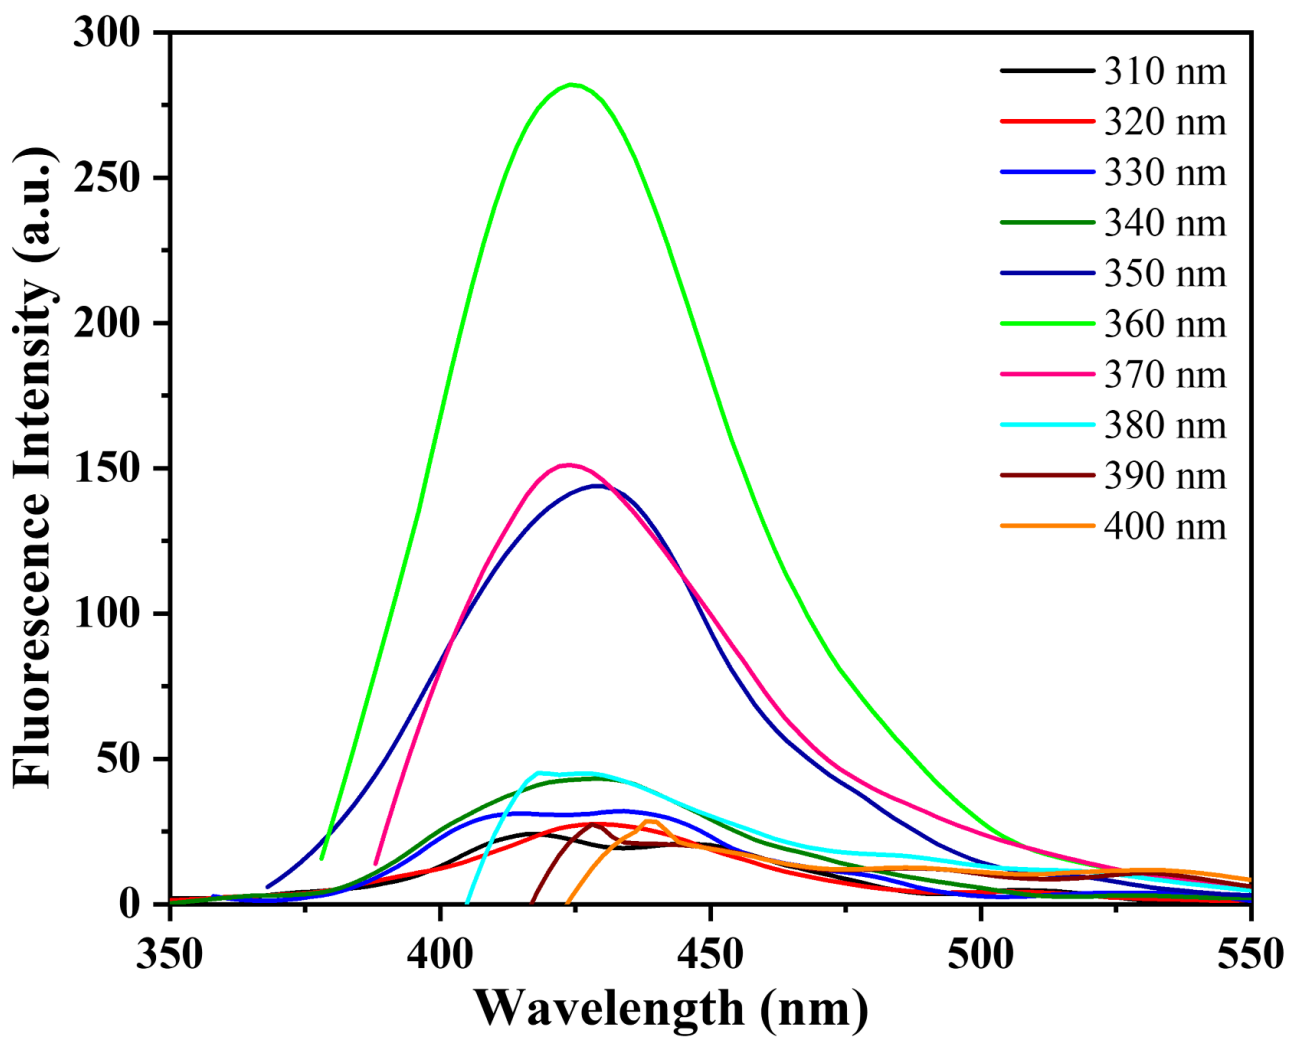

Figure S2. Excitation dependent emission spectra of 6-TG-Au NCs.

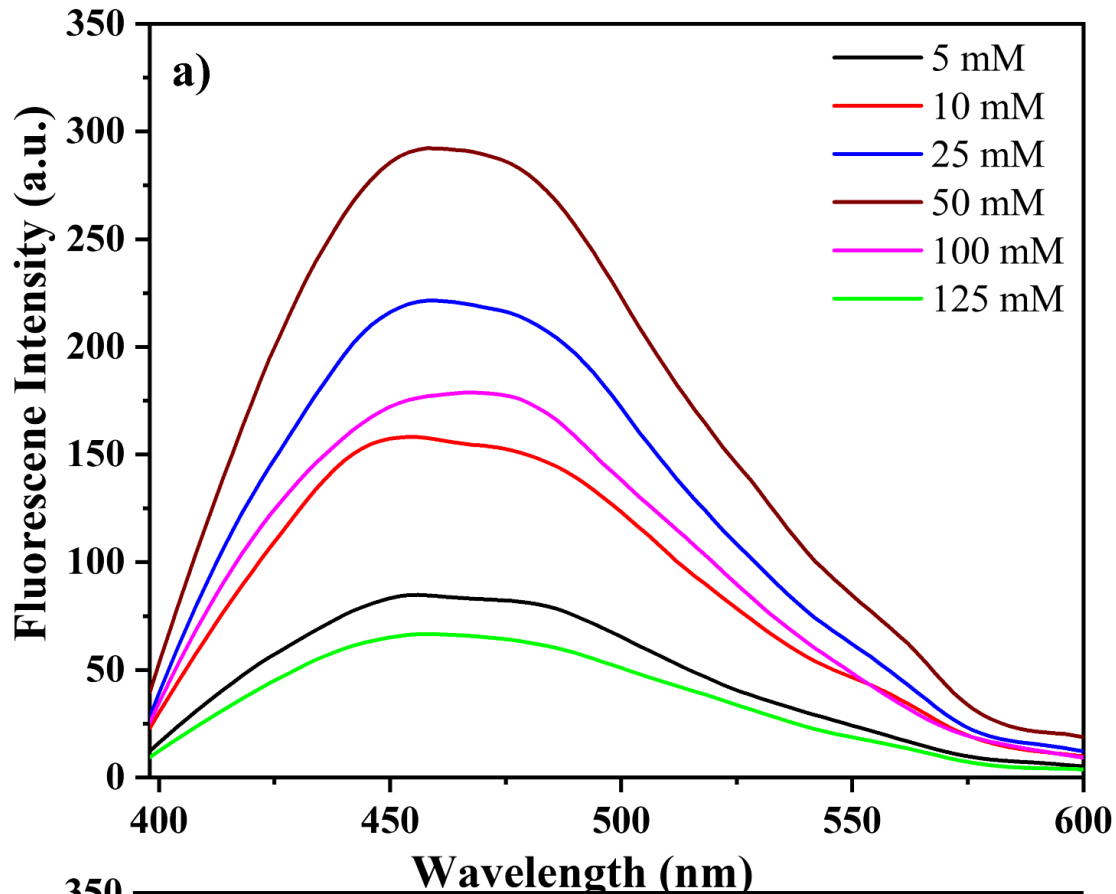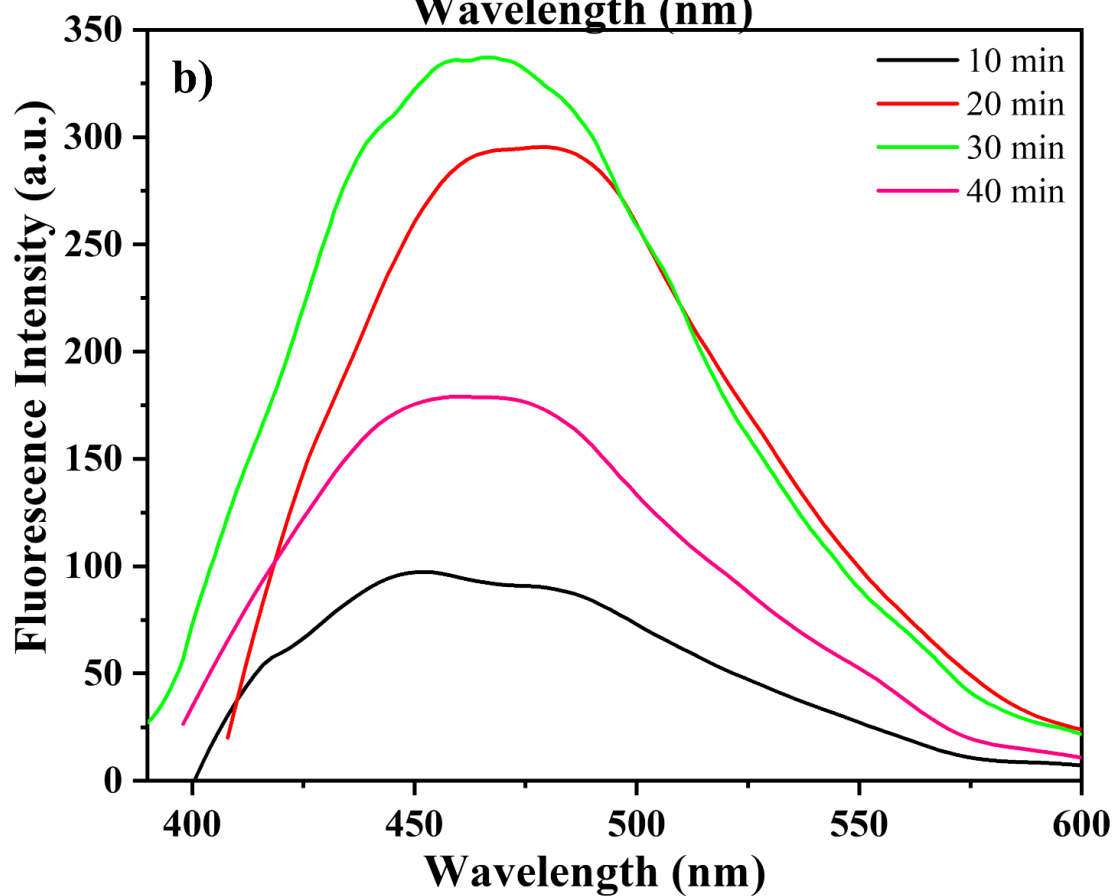

**Figure S3.** Study of optimum parameters a) Trp concentration and b) ultrasonication time for synthesis of 6-TG-Trp-Au NCs.

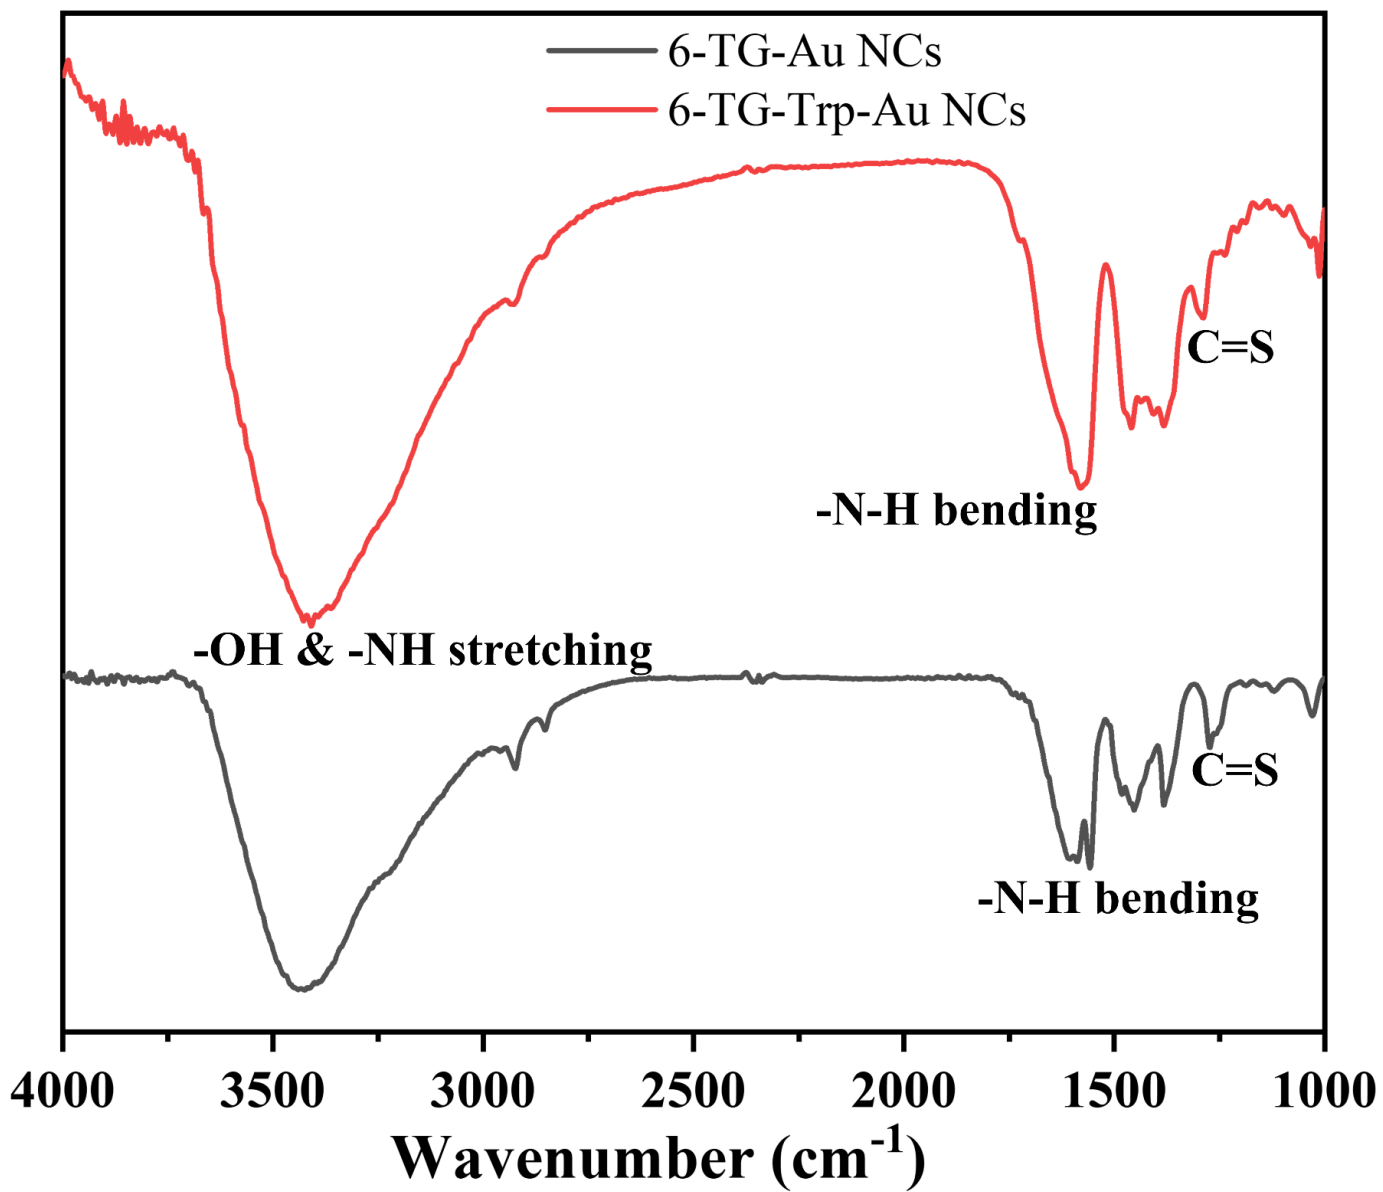

**Figure S4.** FT-IR spectra of 6-TG-Au NCs and 6-TG-Trp-Au NCs.

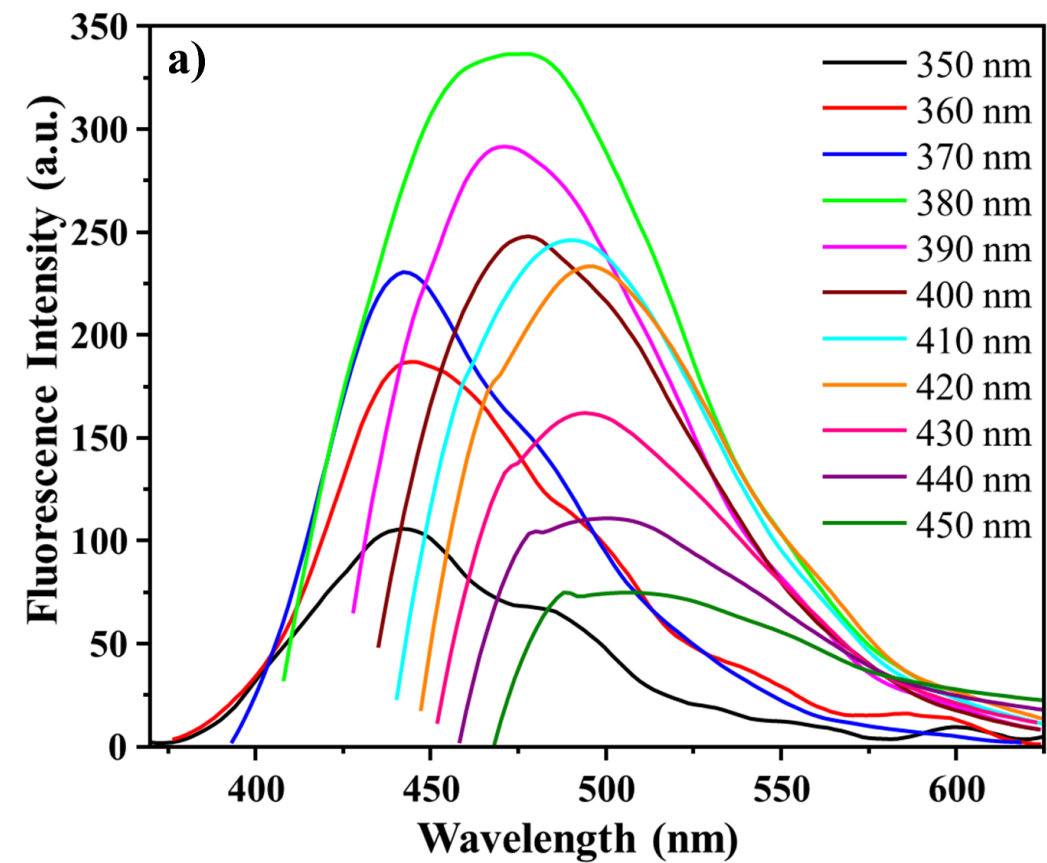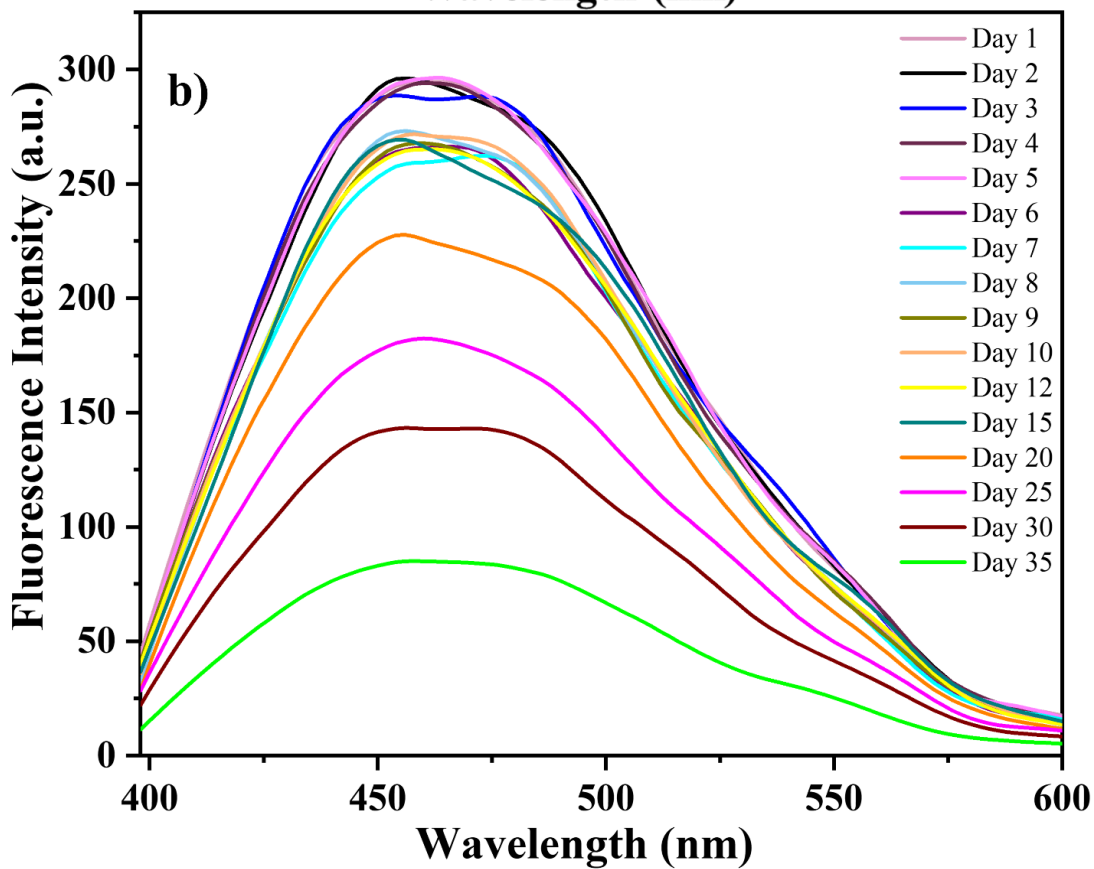

**Figure S5.** a) Excitation dependent emission spectra of 6-TG-Trp-Au NCs b) stability study of synthesized 6-TG-Trp-Au NCs.

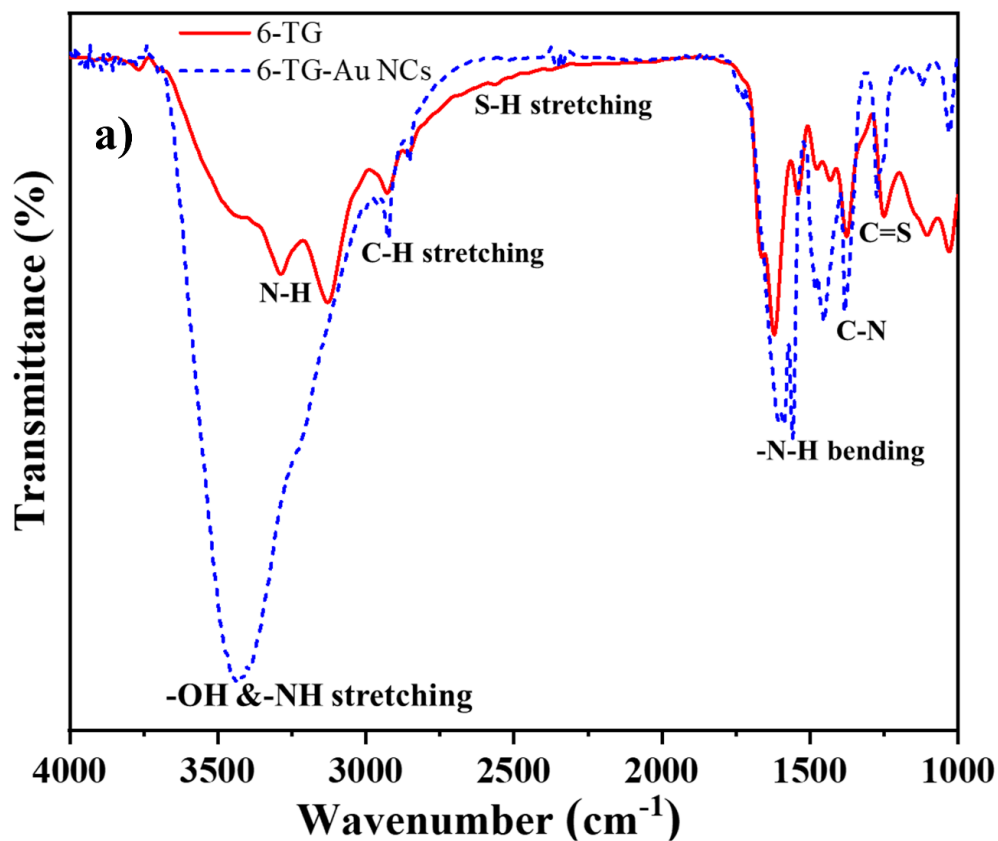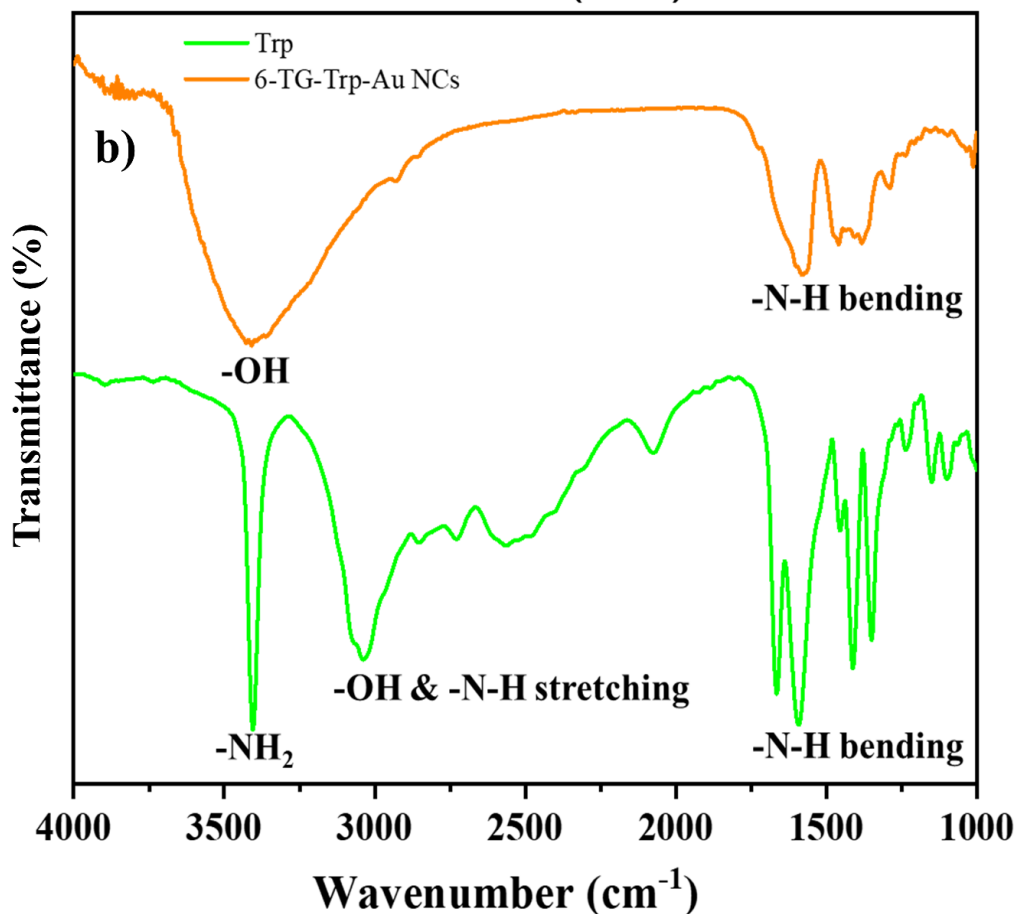

**Figure S6.** FT-IR spectra of a) 6-TG and 6-TG-Au NCs and b) pure Trp and 6-TG-Trp-Au NCs.

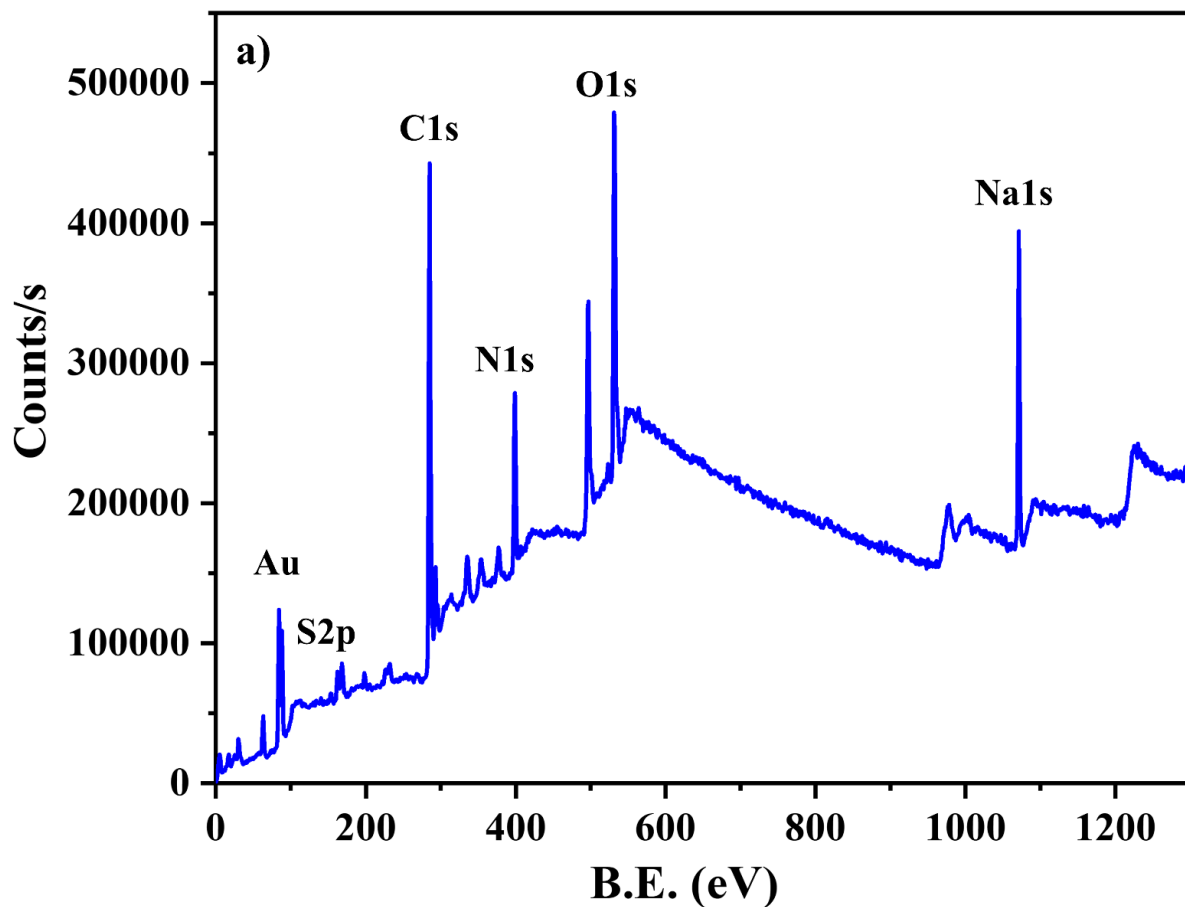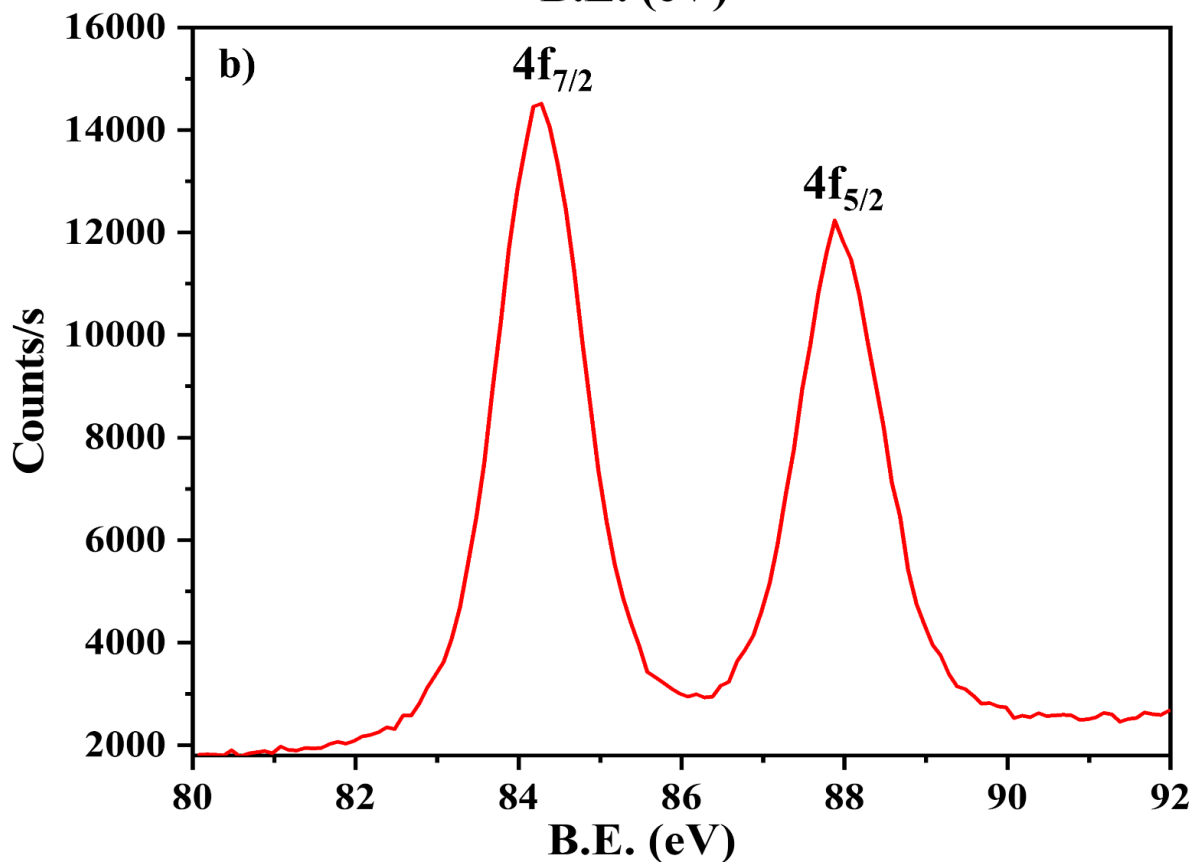

**Figure S7** a) XPS survey of 6-TG-Trp-Au NCs b) XPS graph showing 4f state of Au in 6-TG-Trp-Au NCs.



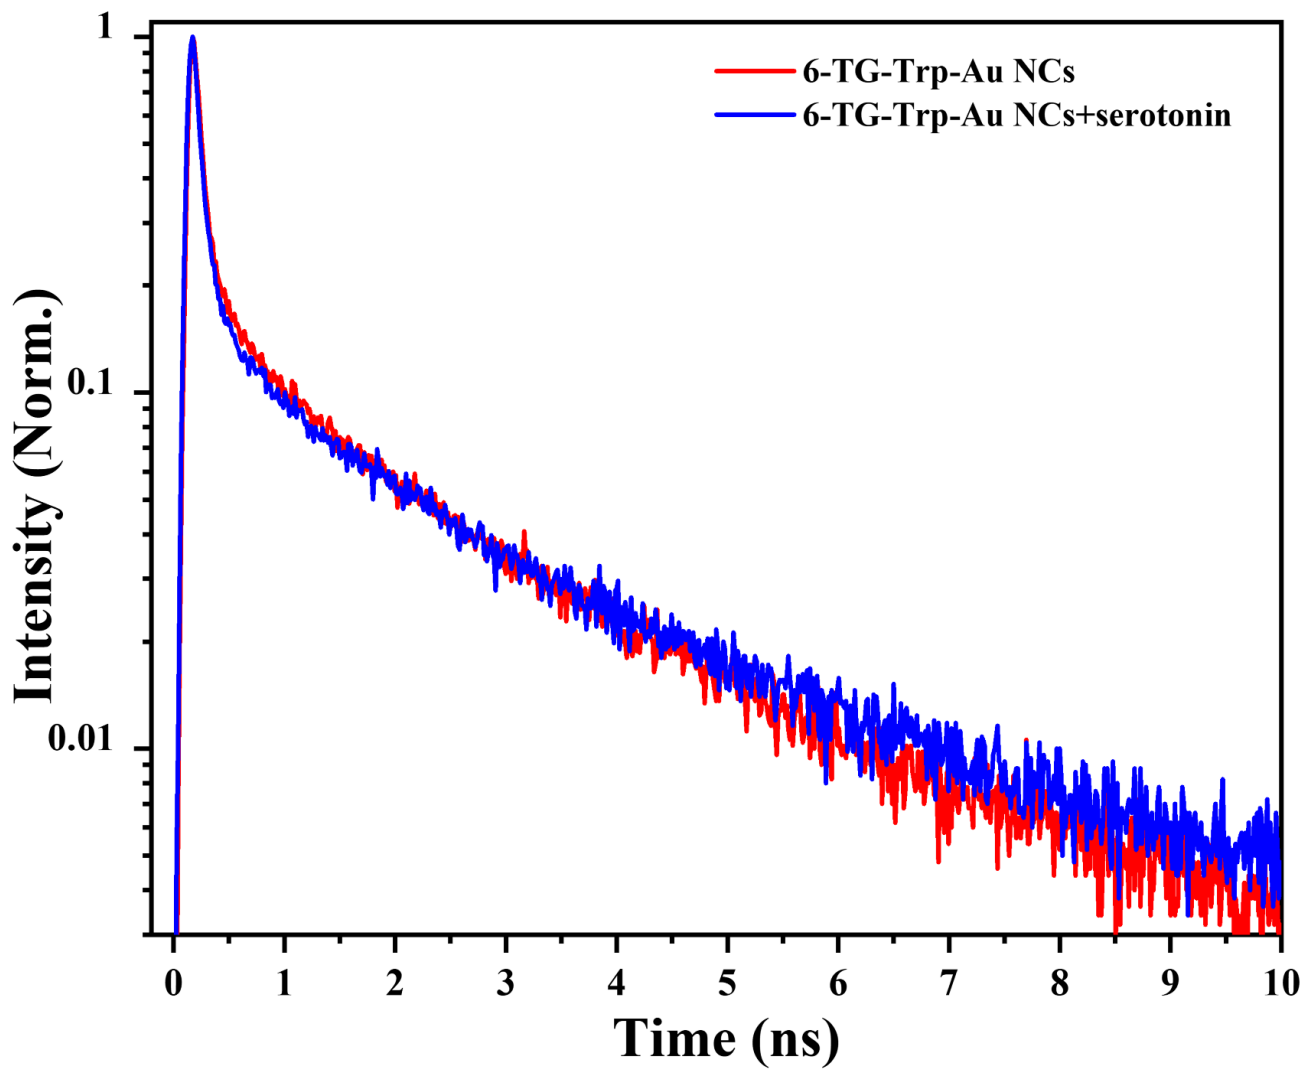

**Figure S8.** Fluorescence lifetime spectra of 6-TG-Trp-Au NCs and with serotonin.

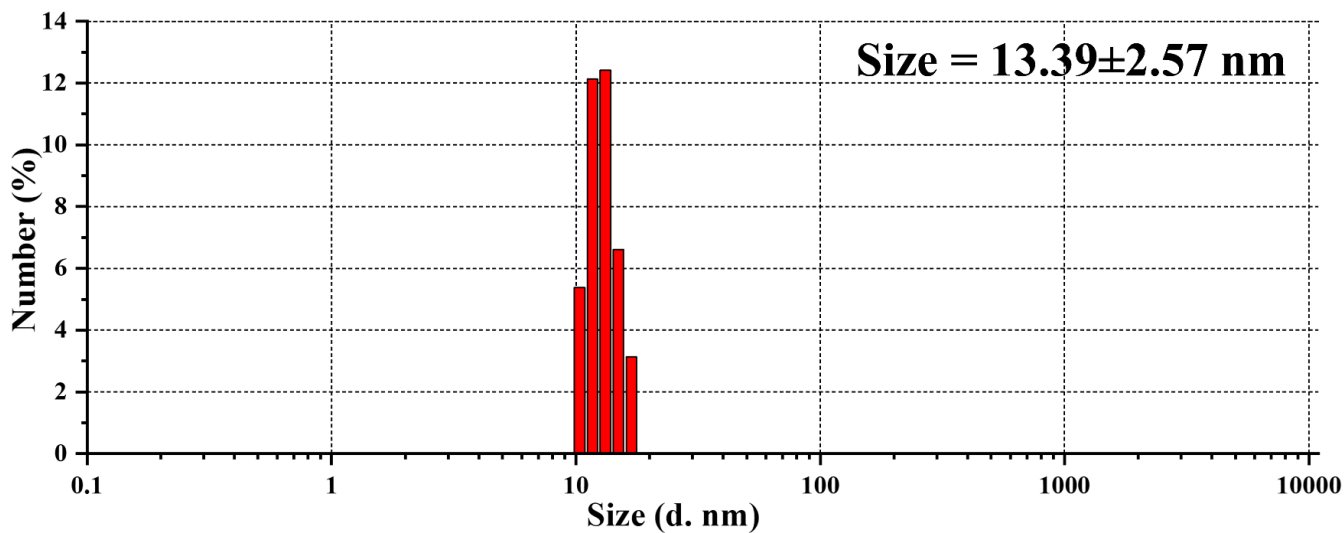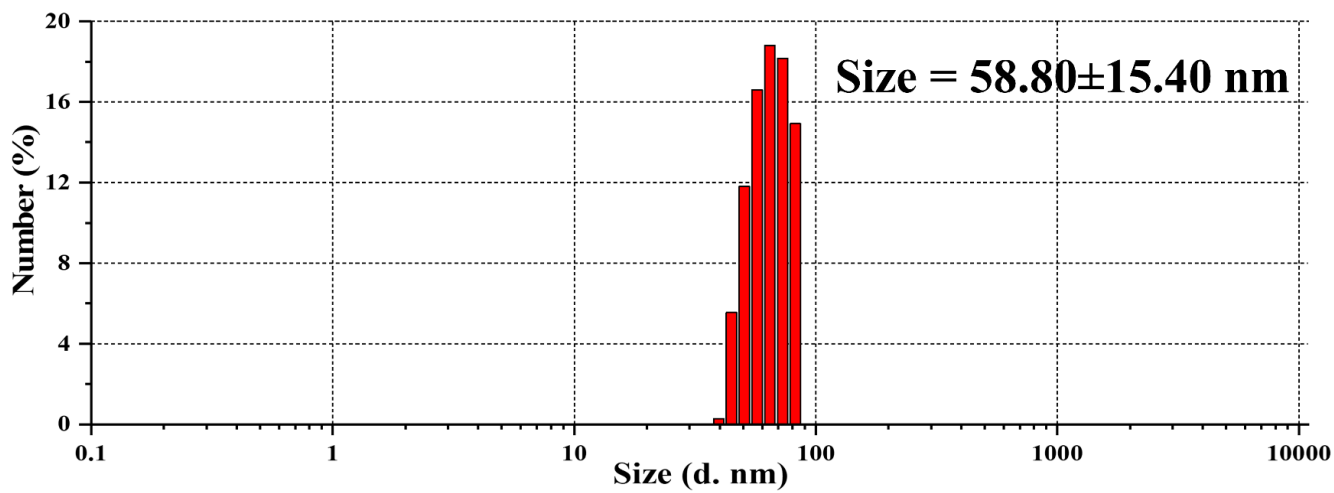

**Figure S9.** DLS data of a) 6-TG-Trp-Au NCs and b) 6-TG-Trp-Au NCs with serotonin.

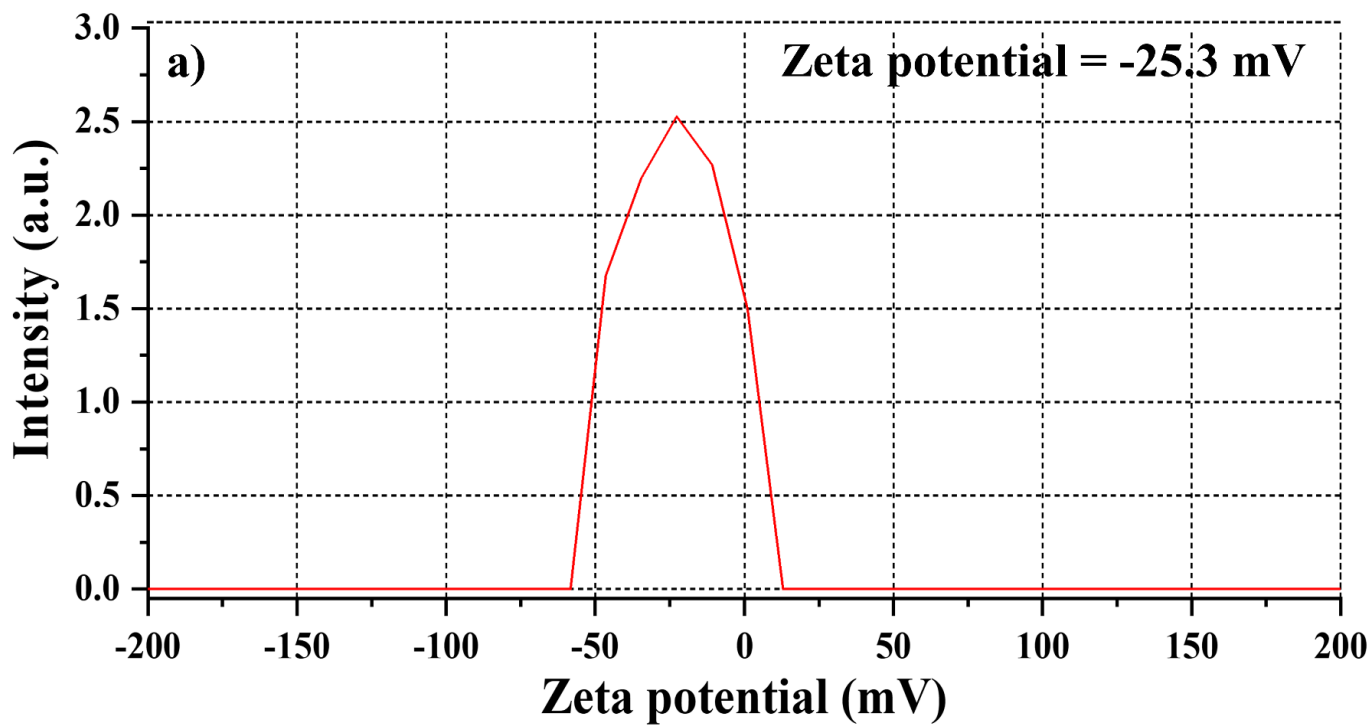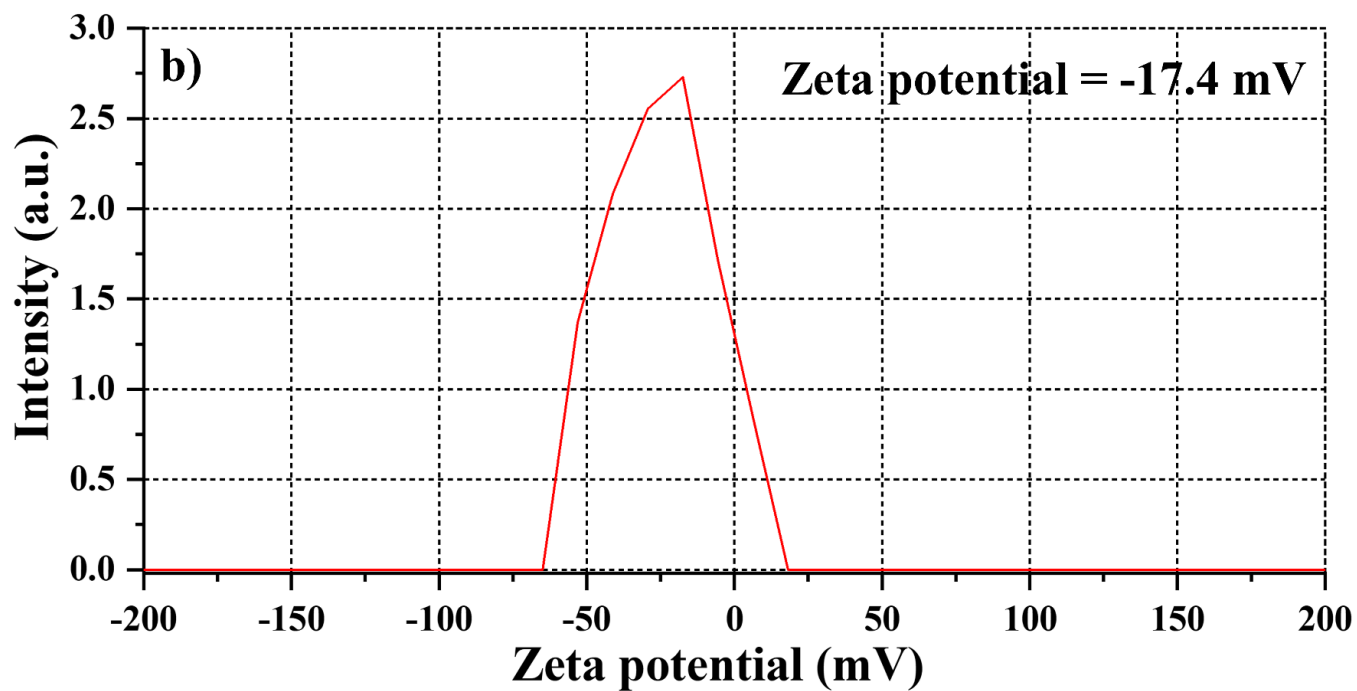

**Figure S10.** Zeta potential of a) 6-TG-Trp-Au NCs b) 6-TG-Trp-Au NCs with serotonin.

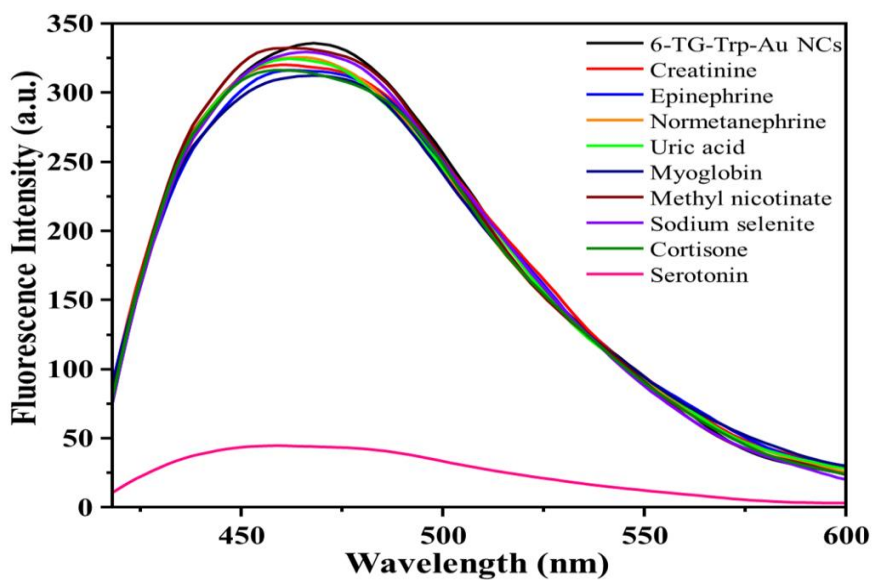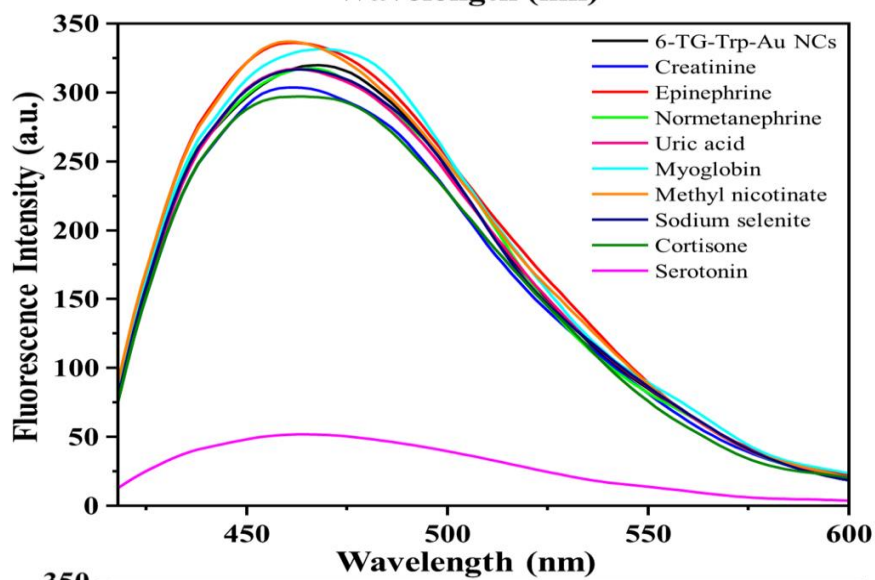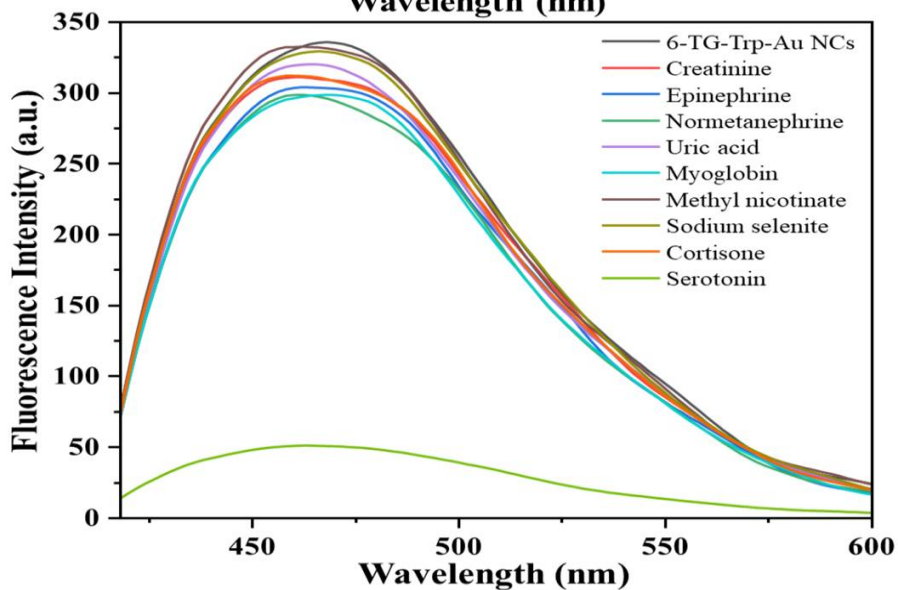

**Figure S11.** Serotonin detection repeated study (n=3) for repeatability.

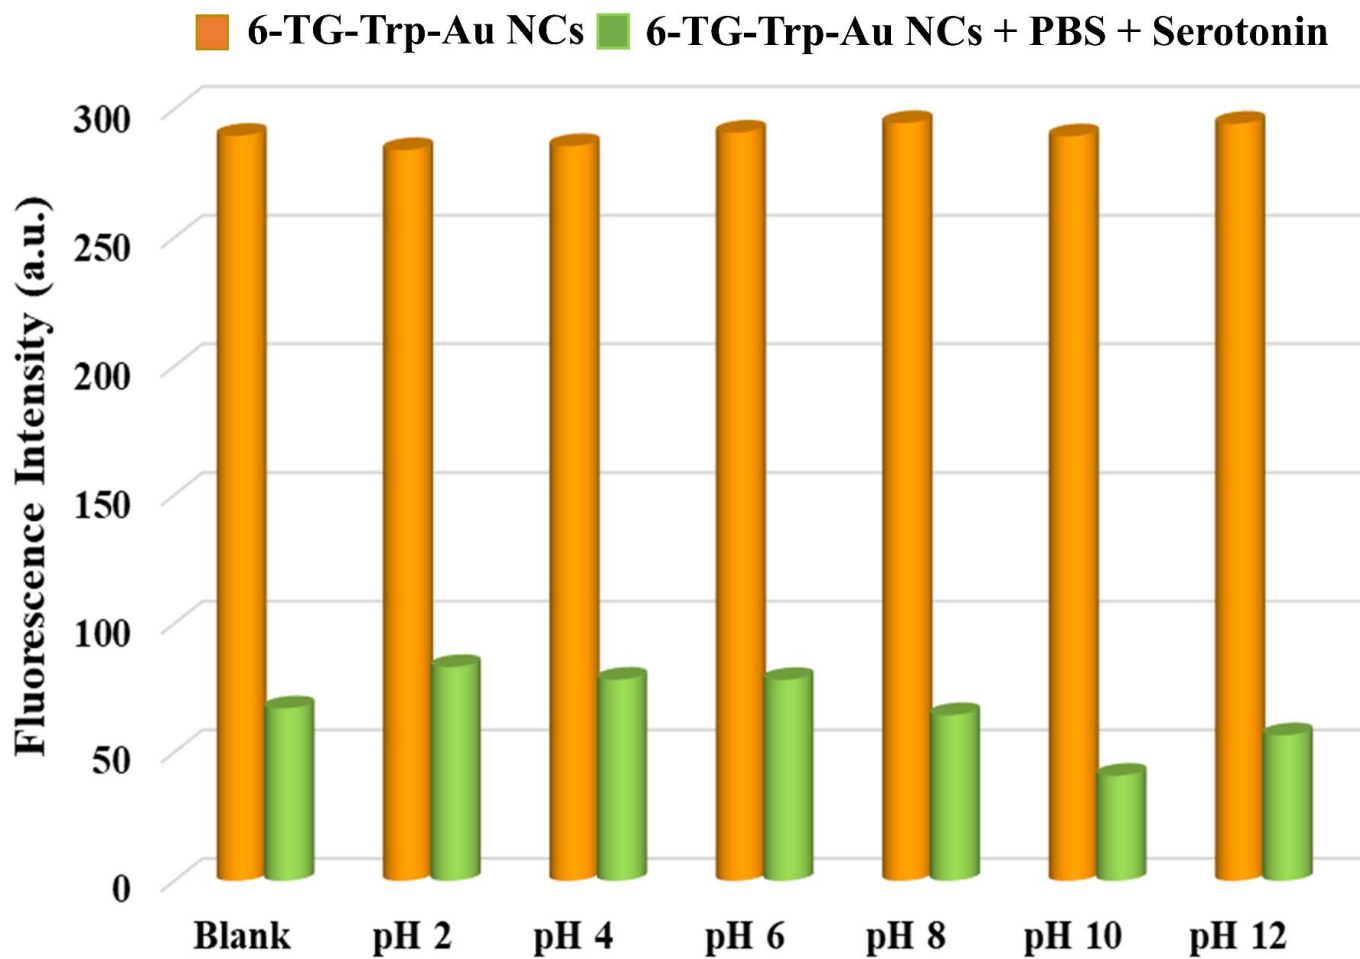

**Figure S12.** Effect of PBS pH from 2 to 12 on fluorescence spectra of 6-TG-Trp-Au NCs with and without addition of serotonin.

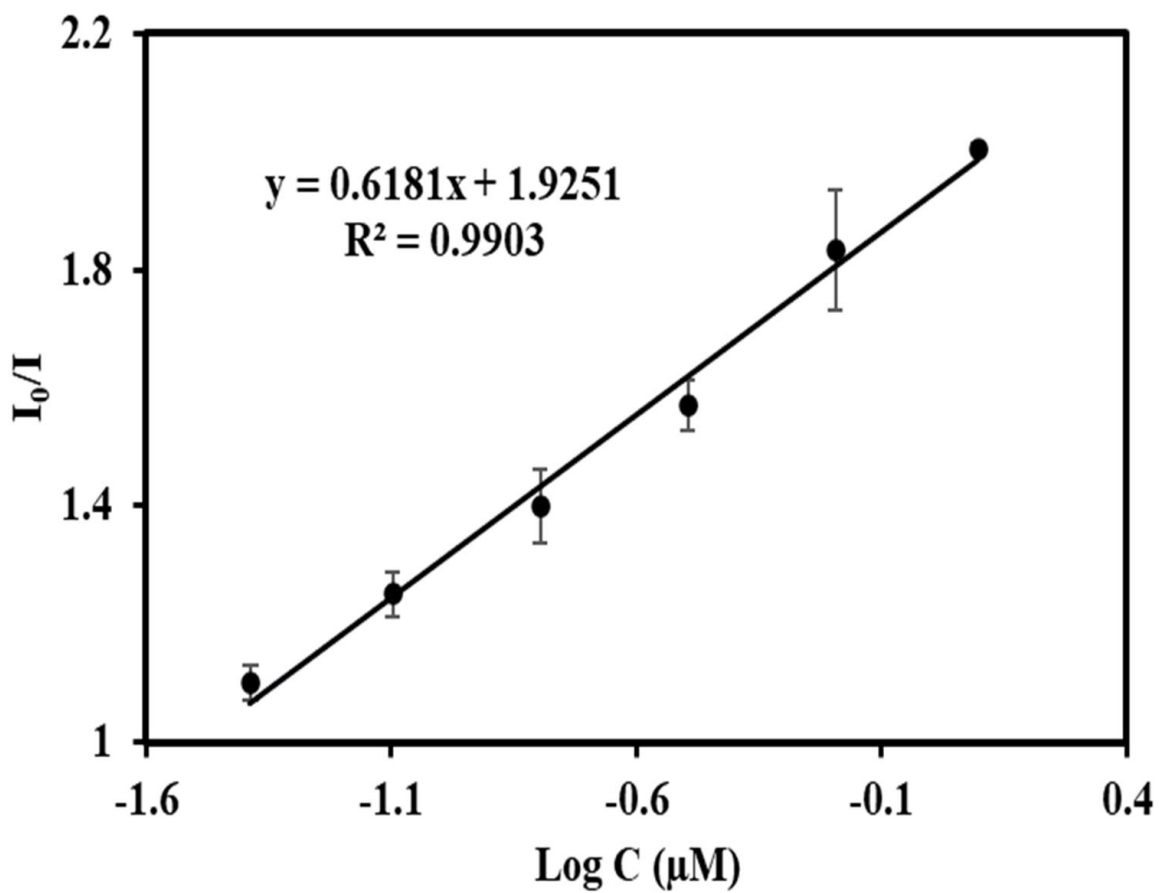

**Figure S13.** Calibration curve constructed between  $I_0/I$  and concentration of serotonin (0.041-1.25  $\mu\text{M}$ ).

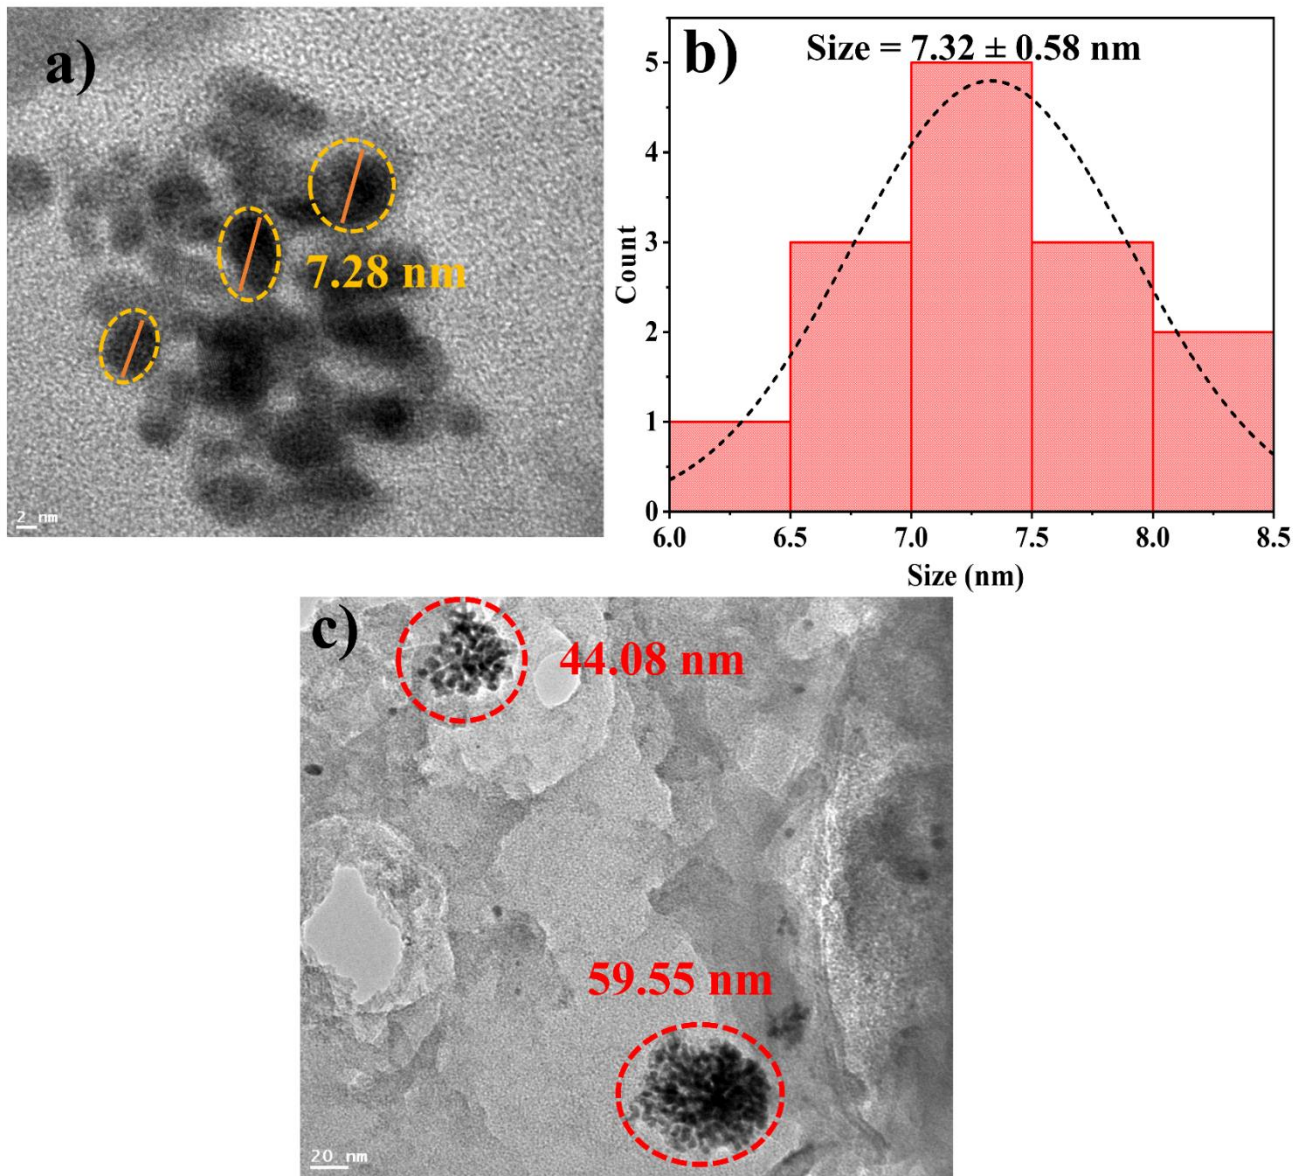

**Figure S14.** HRTEM images showing aggregation of 6-TG-Trp-Au NCs in presence of serotonin a) at 2 nm scale bar b) histogram showing increased size of 6-TG-Trp-Au NCs c) 6-TG-Trp-Au NCs-serotonin nano-aggregates at 20 nm scale bar.

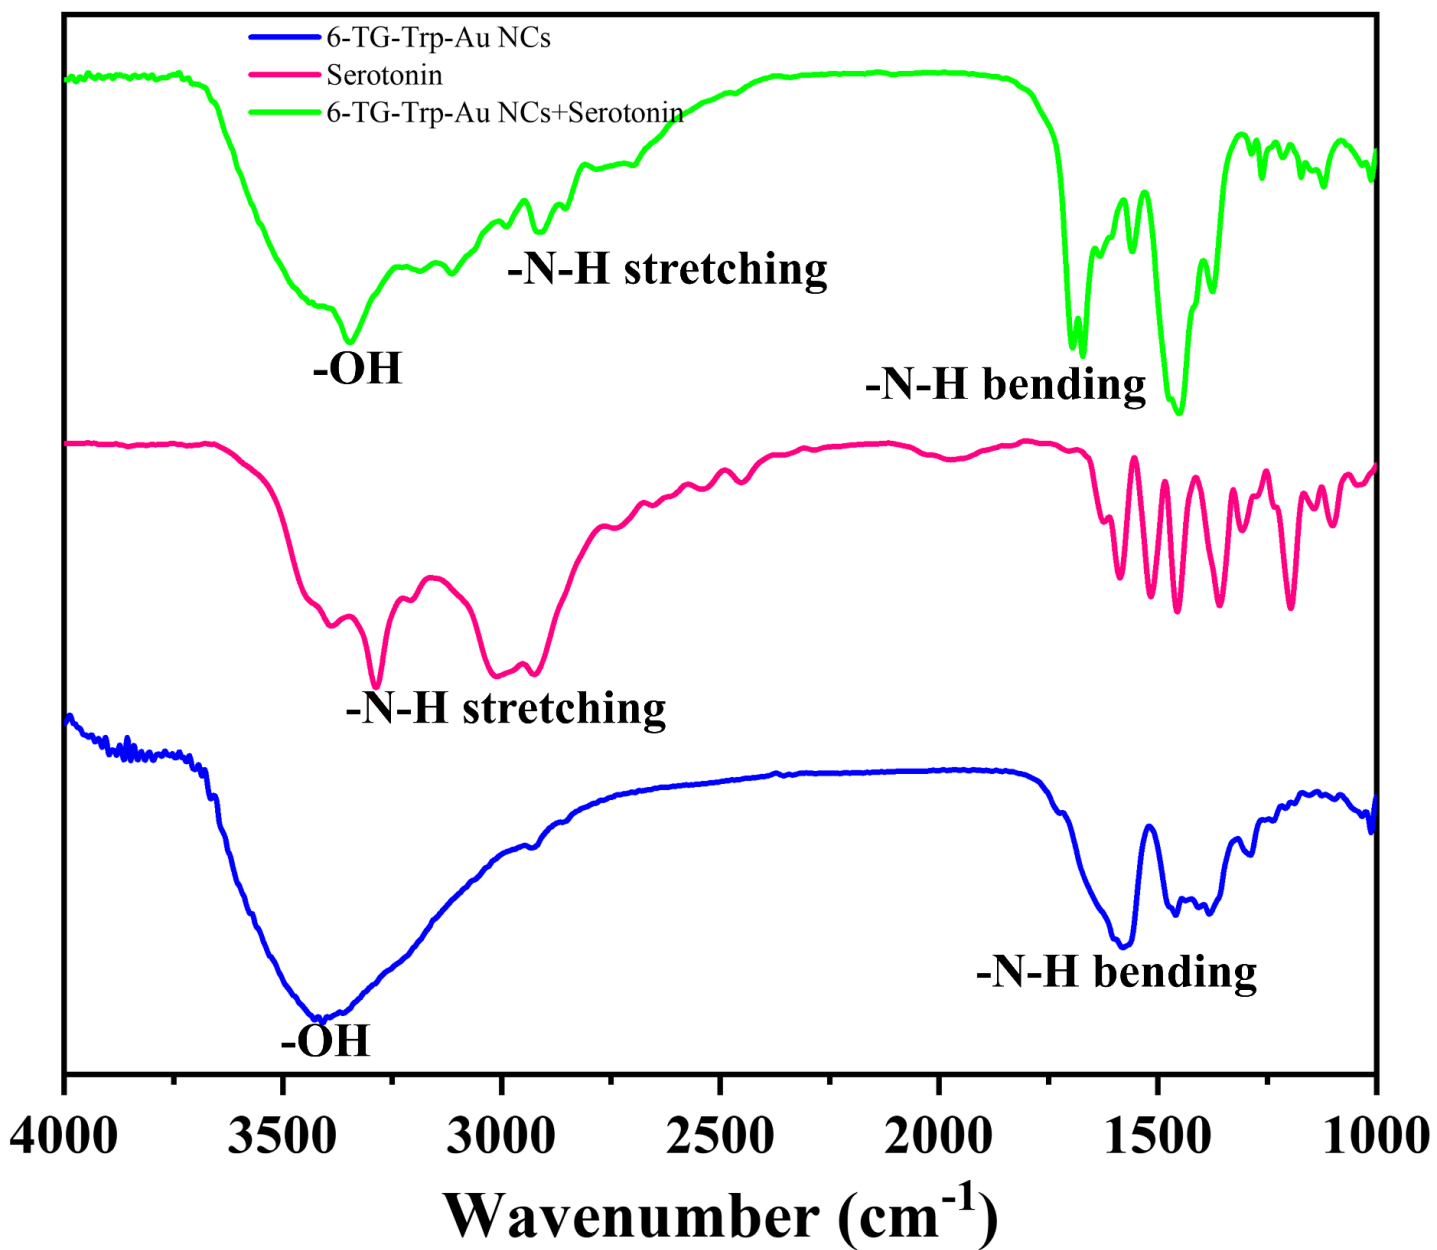

**Figure S15.** FT-IR spectra of 6-TG-Trp-Au NCs, serotonin and 6-TG-Trp-Au NCs with serotonin.



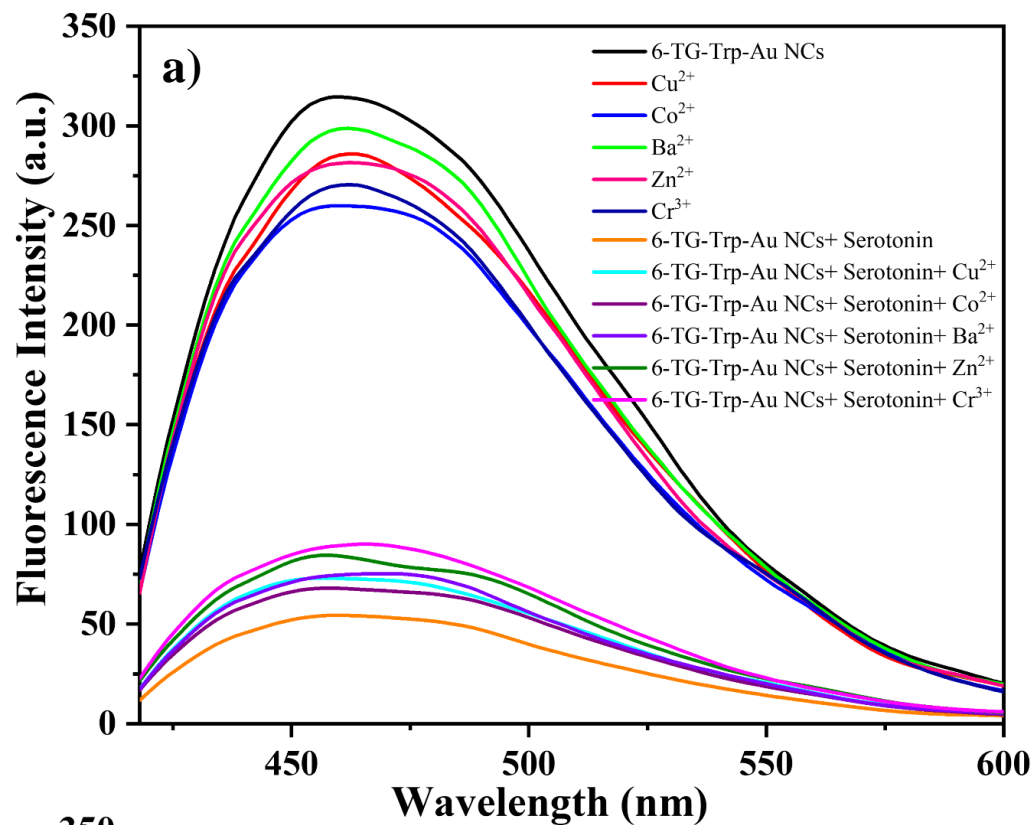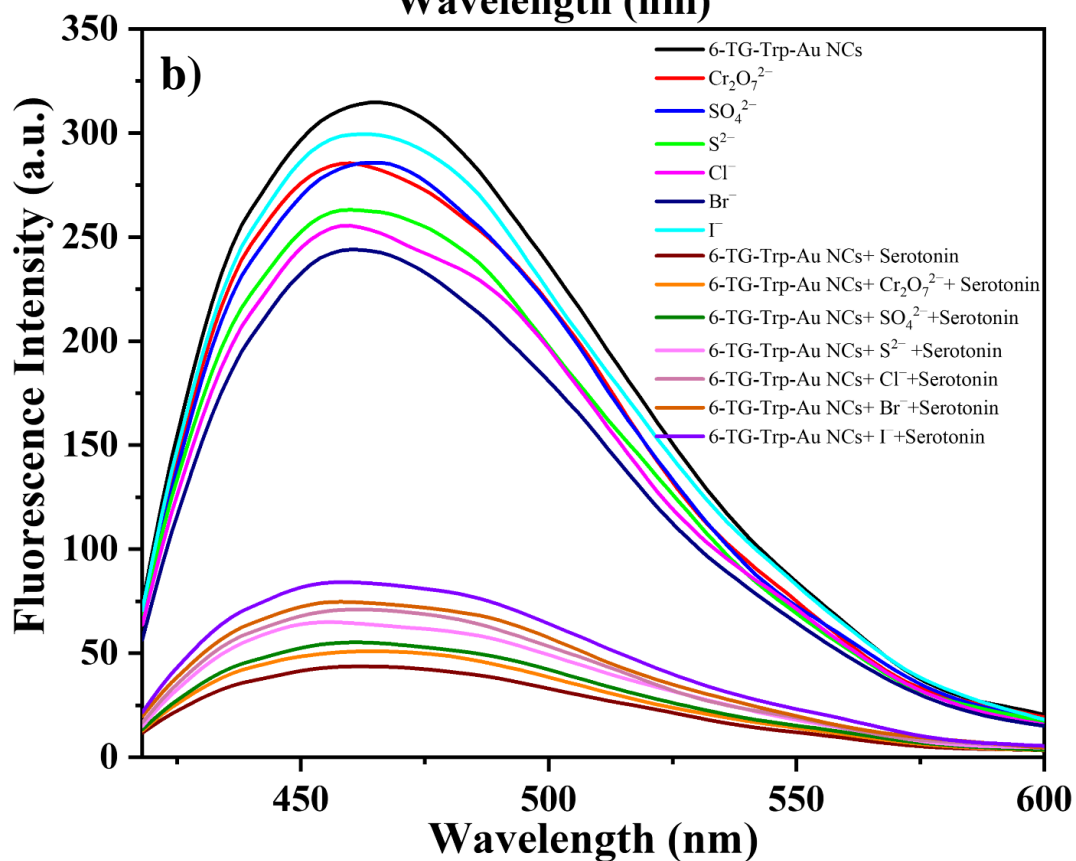

**Figure S16.** Fluorescence emission spectra of 6-TG-Trp-Au NCs in presence of interfering agents a) cations b) anions.

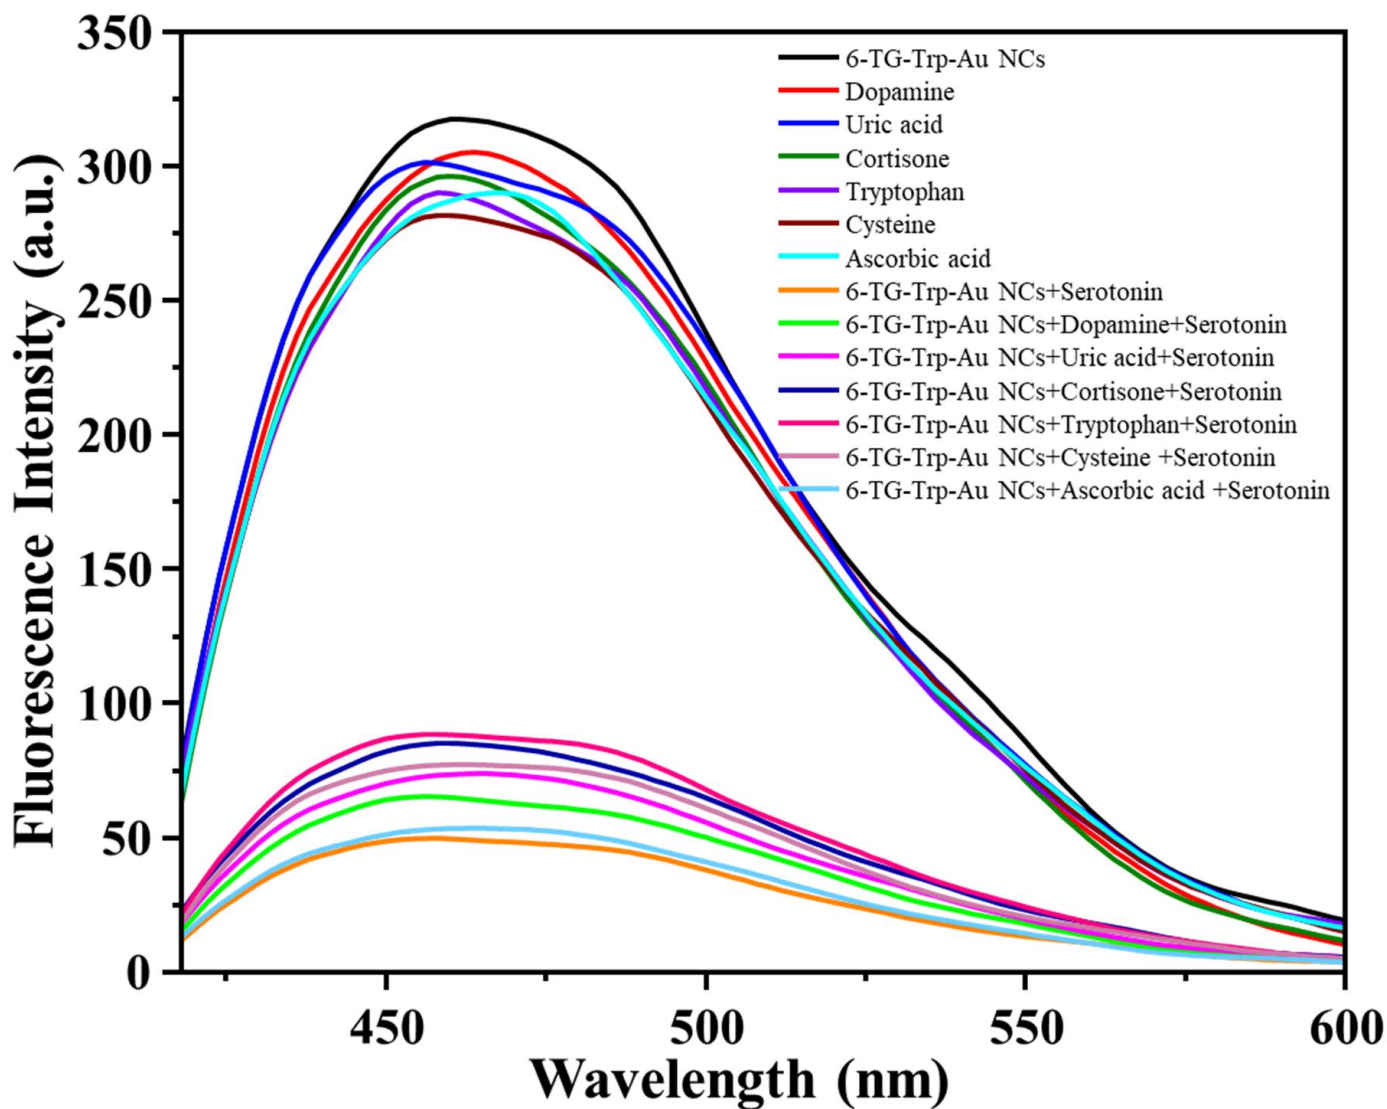

**Figure S17.** Fluorescence emission spectra of 6-TG-Trp-Au NCs in presence of biomarkers (dopamine, uric acid, cortisone, 500  $\mu$ M) and biomolecules (tryptophan, cysteine, ascorbic acid, 500  $\mu$ M).

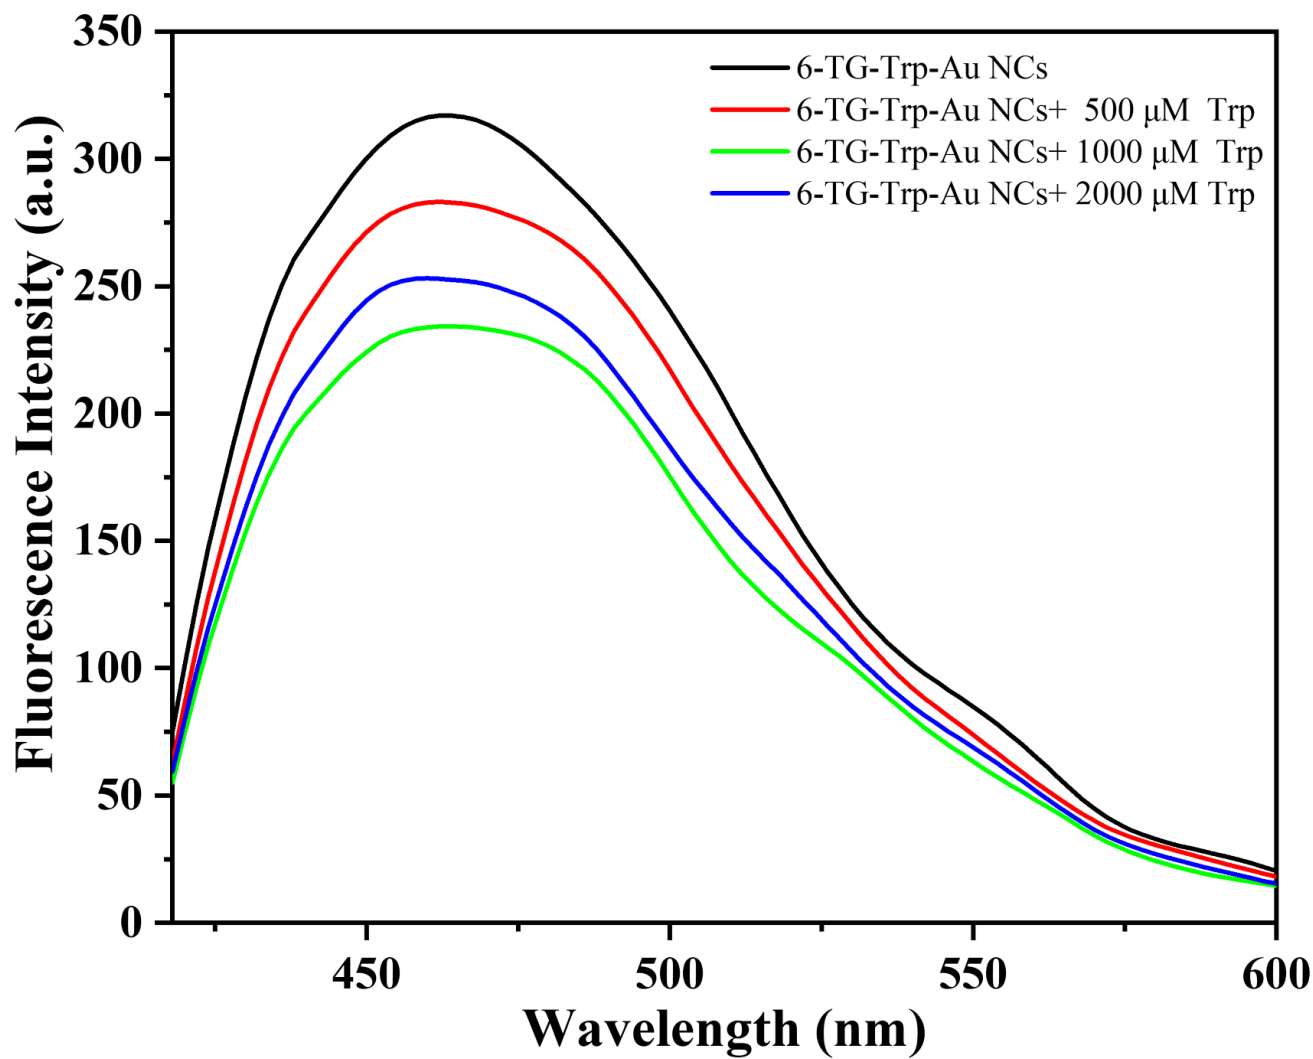

**Figure S18.** Fluorescence emission spectra of 6-TG-Trp-Au NCs in presence of different concentrations of tryptophan as interfering agent.

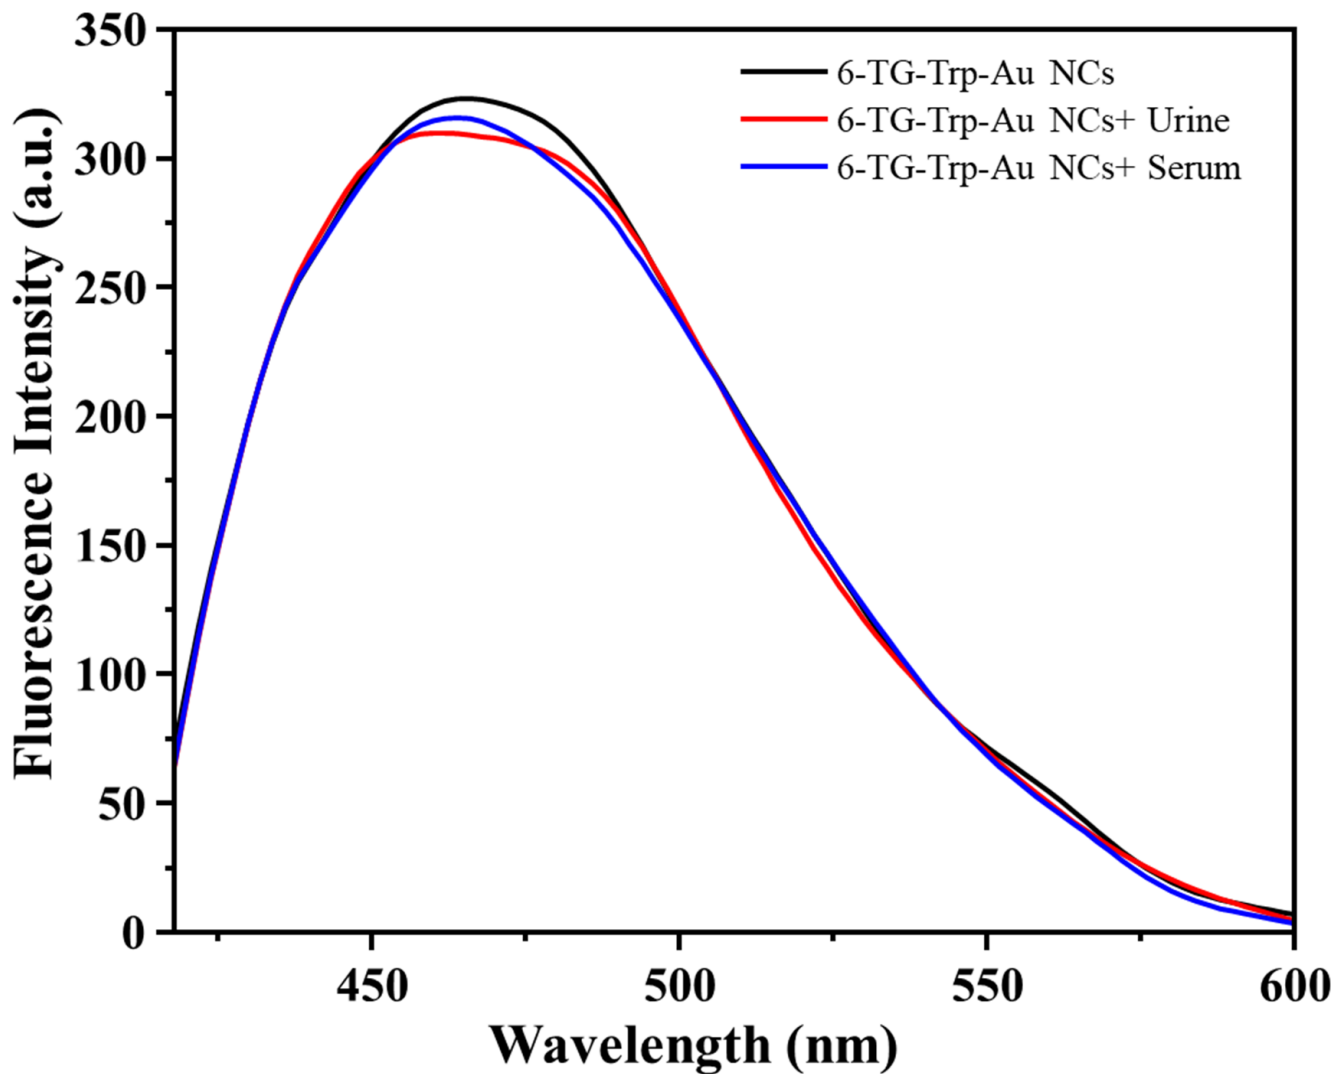

**Figure S19.** Fluorescence emission spectra of 6-TG-Trp-Au NCs in presence of 10 fold diluted urine and serum samples for real sample analysis.

**Table S1.** Serotonin assay in biofluids using 6-TG-Trp-Au NCs as a fluorescent probe

| <b>Biomarker</b> | <b>Sample</b> | <b>Added concentration (nM)</b> | <b>Found Concentration (nM)</b> | <b>% Recovery (n=3)</b> | <b>% RSD (n=3)</b> |
|------------------|---------------|---------------------------------|---------------------------------|-------------------------|--------------------|
| Serotonin        | Urine         | 40                              | 38.55                           | 96.39                   | 0.65               |
|                  |               | 80                              | 74.80                           | 93.50                   | 0.14               |
|                  |               | 160                             | 155.49                          | 97.18                   | 1.03               |
|                  | Serum         | 40                              | 38.75                           | 96.88                   | 0.35               |
|                  |               | 80                              | 79.67                           | 99.58                   | 1.04               |
|                  |               | 160                             | 163.02                          | 101.89                  | 0.27               |
